# Supplementary material for: Prognostic factors of resectable perihilar cholangiocarcinoma: a systematic review and meta-analysis of high-quality studies
Source: PubMed Central journal article supplement — Ther Adv Gastrointest Endosc. 2021 Feb 10;14:2631774521993065. doi: 10.1177/2631774521993065 (PMC7882763; doi:10.1177/2631774521993065), 2021-02-10
Supplement: sj-pdf-1-cmg-10.1177_2631774521993065.pdf [file sj-pdf-1-cmg-10.1177_2631774521993065.pdf]

**Supplement Table 1.** Quality assessment of the included non-randomized controlled trials based on the Newcastle-Ottawa scale.

| <b>Author</b>           | <b>Selection star</b> | <b>Comparability star</b> | <b>Outcome star</b> | <b>Total star</b> |
|-------------------------|-----------------------|---------------------------|---------------------|-------------------|
| Bagante <sup>16</sup>   | 3                     | 3                         | 2                   | 8                 |
| Morine <sup>17</sup>    | 3                     | 2                         | 2                   | 7                 |
| Giuliant <sup>18</sup>  | 3                     | 3                         | 2                   | 8                 |
| Hakeem <sup>19</sup>    | 3                     | 2                         | 2                   | 7                 |
| Hu <sup>20</sup>        | 3                     | 3                         | 2                   | 8                 |
| Hoffmann <sup>21</sup>  | 3                     | 2                         | 2                   | 7                 |
| Nakanishi <sup>22</sup> | 3                     | 2                         | 2                   | 7                 |
| Li <sup>23</sup>        | 3                     | 2                         | 2                   | 7                 |
| Yan <sup>24</sup>       | 3                     | 2                         | 2                   | 7                 |
| Norihisa <sup>25</sup>  | 3                     | 3                         | 2                   | 8                 |
| Hoffmann <sup>7</sup>   | 3                     | 2                         | 2                   | 7                 |
| Coelen <sup>26</sup>    | 3                     | 3                         | 2                   | 8                 |
| Sano <sup>10</sup>      | 3                     | 2                         | 2                   | 7                 |
| Wang <sup>27</sup>      | 3                     | 3                         | 2                   | 8                 |
| Titapun <sup>28</sup>   | 3                     | 2                         | 2                   | 7                 |
| Unno <sup>29</sup>      | 3                     | 2                         | 2                   | 7                 |
| Liu <sup>30</sup>       | 3                     | 2                         | 2                   | 7                 |
| Zaydfudim <sup>31</sup> | 3                     | 2                         | 2                   | 7                 |
| Bhutiani <sup>32</sup>  | 3                     | 2                         | 2                   | 8                 |
| Cheng <sup>33</sup>     | 3                     | 2                         | 2                   | 7                 |
| Chen <sup>34</sup>      | 3                     | 2                         | 2                   | 7                 |
| Wang <sup>35</sup>      | 3                     | 2                         | 2                   | 7                 |
| Cai <sup>36</sup>       | 3                     | 2                         | 2                   | 7                 |
| Kang <sup>37</sup>      | 3                     | 3                         | 2                   | 8                 |
| Seyama <sup>38</sup>    | 3                     | 2                         | 2                   | 7                 |
| DeOliveira <sup>2</sup> | 3                     | 2                         | 2                   | 7                 |
| Silva <sup>39</sup>     | 3                     | 2                         | 2                   | 7                 |
| Olivier <sup>12</sup>   | 3                     | 2                         | 2                   | 7                 |
| Jurgen <sup>40</sup>    | 3                     | 2                         | 2                   | 7                 |
| Nagino <sup>41</sup>    | 3                     | 3                         | 2                   | 8                 |
| Kosuge <sup>42</sup>    | 3                     | 2                         | 2                   | 7                 |
| Neuhaus <sup>43</sup>   | 3                     | 2                         | 2                   | 7                 |
| Cheng <sup>44</sup>     | 3                     | 2                         | 2                   | 7                 |
| Hasegawa <sup>45</sup>  | 3                     | 2                         | 2                   | 7                 |
| Murakami <sup>46</sup>  | 3                     | 2                         | 2                   | 8                 |
| Lee <sup>47</sup>       | 3                     | 2                         | 2                   | 7                 |
| Miyazaki <sup>48</sup>  | 3                     | 2                         | 2                   | 7                 |
| Buettner <sup>49</sup>  | 3                     | 2                         | 2                   | 8                 |
| Chauhan <sup>50</sup>   | 3                     | 2                         | 2                   | 7                 |

|                           |   |   |   |   |
|---------------------------|---|---|---|---|
| Chen et al. <sup>51</sup> | 3 | 2 | 2 | 7 |
| Cho <sup>52</sup>         | 3 | 3 | 2 | 8 |
| Dumitrascu <sup>53</sup>  | 3 | 2 | 2 | 7 |
| Furusawa <sup>54</sup>    | 3 | 2 | 2 | 7 |
| Saxena <sup>55</sup>      | 3 | 2 | 2 | 7 |
| Song <sup>56</sup>        | 3 | 2 | 2 | 7 |
